# Supplementary material for: Targeted Next-Generation Sequencing of 117 Routine Clinical Samples Provides Further Insights into the Molecular Landscape of Uveal Melanoma
Source: Cancers (Basel). 2020 Apr 23;12(4):1039. doi: 10.3390/cancers12041039 (PMC7226611; doi:10.3390/cancers12041039)
Supplement: Supplementary file 1 [file cancers-12-01039-s001.zip]

Archive with 5 entries (4 files):
- cancers-744518- supplementary Tables/
- cancers-744518- supplementary Tables/cancers-744518-Table S1.xlsx
- cancers-744518- supplementary Tables/cancers-744518-Table S2.xlsx
- cancers-744518- supplementary Tables/cancers-744518-Table S3.pdf
- cancers-744518- supplementary Tables/cancers-744518-Table S4.xlsx
