# Supplementary material for: Targeted Next-Generation Sequencing of 117 Routine Clinical Samples Provides Further Insights into the Molecular Landscape of Uveal Melanoma
Source: Cancers (Basel). 2020 Apr 23;12(4):1039. doi: 10.3390/cancers12041039 (PMC7226611; doi:10.3390/cancers12041039)
Supplement: Supplementary file 1 [file cancers-12-01039-s001.zip › cancers-744518- supplementary Tables/cancers-744518-Table S1.xlsx]

## Sheet: SCNA
	MLPA/MSA	NGS		MLPA/MSA	NGS		MLPA/MSA	NGS		MLPA/MSA	NGS		MLPA/MSA	NGS		MLPA/MSA	NGS
Sample	Chr1	Chr1p		Chr3	Chr3		Ch6p	Ch6p		Ch6q	Chr6q		Chr8p	Chr8p		Chr8q	Chr8q
1	N	N		N	N		N	N		N	N		N	N		N	N
2	N	N		L	ID		N	N		N	L		N	L		G	G
3	L	N		L	L		N	N		N	N		N	G		N	G
4	N	N		L	L		N	N		N	N		N	G		N	G
5	N	N		L	L		N	N		N	N		N	N		N	N
6	N	N		L	L		G	N		N	N		N	N		N	N
7	N	G		N	N		G	G		N	L		N	N		G	G
8	L	L		L	L		N	N		L	N		G	G		G	G
9	N	N		L	L		N	N		N	N		N	L		G	G
10	L	N		L	L		N	N		N	N		N	G		U	G
11	U	L		L	L		N	N		N	N		N	G		N	G
12	N	N		L	L		U	N		N	N		N	G		N	G
13	L	L		L	N		G	G		N	N		N	G		G	G
14	N	L		U	L		N	N		N	N		L	G		G	G
15	N	N		L	N		N	G		G	L		N	G		G	G
16	N	N		L	L		G	N		L	N		N	L		G	G
17	L	L		L	L		U	N		N	N		N	N		N	G
18	L	L		L	L		N	N		N	N		G	G		G	G
19	N	N		L	L		N	N		N	N		L	L		G	G
20	L	L		L	L		N	N		N	N		N	G		G	G
21	L	L		L	L		N	N		N	N		N	N		G	G
22	U	N		L	L		N	N		N	N		N	N		G	G
23	N	N		L	L		G	G		L	L		L	L		G	G
24*	N	N		L	L		N	N		N	N		G	G		G	G
25	L	G		L	L		U	N		G	N		U	G		G	G
26	N	N		L	L		N	N		N	N		N	N		G	G
27	L	L		L	L		N	N		L	L		L	L		G	G
28	N	N		N	N		U	G		N	N		L	N		G	N
29	N	N		N	N		G	G		G	L		G	N		G	G
30	N	N		L	L		N	N		N	N		N	L		U	G
31	G	N		L	L		G	N		L	N		N	L		N	G
32	L	L		L	L		U	N		N	N		N	G		U	G
33	N	N		L	L		U	N		N	N		L	N		G	G
34	N	N		U	N		U	N		N	N		N	N		N	N
35	L	L		L	N		G	G		N	N		G	G		N	G
36	U	N		L	N		U	G		N	N		G	G		U	G
37	U	N		L	L		N	N		N	N		N	G		N	G
38	N	N		L	L		L	N		N	N		N	N		N	N
39	L	L		L	L		N	N		N	N		N	G		N	G
40	L	N		L	L		N	N		N	N		N	G		N	G
41	N	N		L	L		U	N		N	N		N	G		N	G
42	N	N		N	N		G	G		L	L		N	G		G	G
43	L	L		N	N		G	G		N	N		N	N		G	G
44	N	N		L	L		G	N		L	N		N	G		G	G
45*	N			N			N	FAILED		N			G			G
46	L	L		U	L		N	G		L	L		G	L		G	G
47	N	N		N	N		G	G		L	L		N	N		G	G
48	N	N		N	N		G	G		L	L		N	N		G	G
49	N	N		N	ID		G	G		L	L		L	L		G	G
50	N	N		N	N		N	G		N	G		N	N		G	N
51	N	N		N	N		G	G		L	L		N	N		G	G
52	L	N		N	N		G	N		L	N		N	N		G	N
53	L	L		N	PL		G	G		N	L		G	G		G	G
54		N		N	N			N			N			L			G
55	N	G		N	N		G	G		L	N		L	N		G	G
56	L	L		N	N		G	G		L	L		N	N		G	G
57	N	N		N	N		G	G		L	L		G	L		G	G
58	N	L		N	L		G	N		L	N		L	L		G	G
59	U	N		N	N		G	G		L	N		N	N		G	G
60	N	L		N	N		N	G		N	L		N	L		N	G
61	N	N		N	N		G	N		U	N		N	N		N	N
62	N	N		N	N		G	G		L	N		N	N		G	N
63	L	N		N	N		G	G		G	G		N	N		L	N
64	N	N		N	N		G	G		N	N		N	N		N	N
65	N	N		N	N		G	G		N	N		N	N		N	N
66	N	N		N	N		U	N		N	N		N	N		N	N
67	N	N		N	N		U	G		L	L		N	N		N	N
68	N	N		N	N		G	G		N	N		N	N		N	N
69	N	N		N	N		U	N		N	N		N	N		N	N
70	N	N		N	N		N	G		N	N		N	N		N	G
71	N	N		N	N		U	G		U	N		N	N		N	N
72	N	N		N	N		N	N		N	N		N	N		N	N
73	N	N		N	N		G	G		N	N		N	N		N	N
74	N	N		N	N		N	N		N	N		N	N		N	N
75	L	L		N	N		G	G		N	N		N	N		N	N
76	N	N		N	N		N	N		N	N		N	N		N	N
77	N	N		N	N		G	G		G	G		G	N		N	N
78	N	N		N	L		N	N		N	N		N	N		N	N
79	L	N		L	L		G	N		N	N		N	G		G	G
80	L	N		L	L		N	N		N	N		N	G		N	G
81*	L	N		L	L		G	N		N	N		N	G		G	G
82	N	N		N	N		G	G		N	N		N	G		G	G
83	L	N		L	L		U	N		G	N		U	N		U	G
84	L	N		U	N		G	N		G	N		G	N		G	N
85*	L	N		L	L		L	N		N	N		N	G		G	G
86		N		N	N			N			N			N			N
87	N	N		L	L		L	G		U	L		L	L		G	G
88	N	N		L	L		N	N		N	N		L	L		G	G
89	N	N		L	L		N	N		L	L		L	L		G	G
90*	N	N		N	N		N	N		N	N		N	N		G	G
91	N	N		L	L		N	N		N	N		N	N		G	N
92	N	N		N	N		N	N		N	N		G	N		N	N
93	N	L		N	N		N	N		N	N		N	N		N	N
94	N	N		L	L		G	G		N	L		N	L		G	G
95	L	L		L	L		N	N		N	N		N	G		G	G
96		L		L	L			G			L			G			G
97		L		L	L			N			N			N			N
98		N		L	L			N			N			N			N
99		G		L	L			N			N			N			G
100	N	N		N	N		G	G		L	L		N	N		G	N
101	N	N		N	N		G	G		N	N		N	G		G	G
102	L	N		N	N		G	N		N	N		N	G		N	G
103		N		N	N			G			G			G			G
104		N		N	N			N			N			N			N
105		N		N	N			G			G			N			N
106		N		N	N			N			N			N			N
107		N		L3q	L3q			N			N			N			N
108		L		L3p	L			N			N			G			G
109*	N	N		N	N		U	G		N	L		G	G		U	G
110*	N	N		L	L		N	N		N	N		L	G		G	G
111*	L	L		L	L		L	N		U	N		N	N		U	N
112*	U	N		L	L		U	G		U	L		N	N		G	G
113*	N	N		L	L		N	G		N	L		L	L		G	G
114*	N	N		N	N		G	G		N	N		N	N		G	N
115*	N	N		N	N		G	G		N	N		N	N		N	N
116*	N	N		L	L		N	N		N	N		N	N		G	N
117*	N	N		L	L		N	N		N	N		L	L		G	G

## Sheet: Key
Letter Key	L	Loss
	N	Normal
	G	Gain
	U	Unclassified
	ID3	Isodisomy 3
	PL	Partial loss
Color key	Blue	Discordant results
	Red	Sample failed
