# Supplementary material for: Targeted Next-Generation Sequencing of 117 Routine Clinical Samples Provides Further Insights into the Molecular Landscape of Uveal Melanoma
Source: Cancers (Basel). 2020 Apr 23;12(4):1039. doi: 10.3390/cancers12041039 (PMC7226611; doi:10.3390/cancers12041039)
Supplement: Supplementary file 1 [file cancers-12-01039-s001.zip › cancers-744518- supplementary Tables/cancers-744518-Table S2.xlsx]

## Sheet: Molecular Data 
Sample	Age at PM	Gender	Primary treatment	Date of PM	Secondary treatment	Epithelioid cells	Loops	Mitotic Count/40HPF	Necrosis	LBD (mm)	UH (mm)	AJCC	CBI	EO Spread	Survival time (days)	Survival time (months)	Status	Date of last follow up/death	nBAP1 IHC	GNAQ	GNA11	BAP1	SF3B1	EIF1AX	CYSLTR2	PLCB4	SRSF2	KTN1	TTC28	CSMD1	TP53BP1	BRAF	DLK2	FBXW7	Chr1p	Chr1q	Chr3	Ch6p	Chr6q	Chr8p	Chr8q	Copies of 8q
1	64	M	Local resection	2010-09-07		N	N	5	N	19	11.3	4	Y	N	3303	108.592	0	2019-09-23		0	1	0	0	1	0	0	0	0	0	0	0	0	0	0	N	N	N	N	N	N	N
2	79	F	Enucleation	2010-04-27		Y	Y	4	Y	10.5	2.8	1	Y	Y	644	21.1726	1	2012-01-31	0	1	0	1	0	0	0	0	0	0	0	0	0	0	0	0	N	N	ID	N	L	L	G	8.93775
3	58	F	Enucleation	2009-03-27		Y	Y	8	Y	16.6	8.1	3	Y	N	1178	38.7288	1	2012-06-17	0	0	1	1	0	0	0	0	0	0	0	0	0	0	0	0	N	N	L	N	N	G	G	3.07016
4	48	M	Local Resection	2009-08-18		Y	Y	6	N	16.8	9.5	3	N	N	2498	82.126	1	2016-06-20	0	0	1	1	0	0	0	0	0	0	0	0	0	0	0	0	N	N	L	N	N	G	G	3.04008
5	81	M	Enucleation	2009-08-18		Y	N	6	Y	19.2	10.3	4	Y	N	2168	71.2767	1	2015-07-26	0	0	1	1	0	0	0	0	0	0	0	0	0	0	0	0	N	N	L	N	N	N	N
6	84	F	Enucleation	2008-04-15		Y	Y	3	N	12.3	3.6	2	Y	N	2834	93.1726	2	2016-01-18		0	1	0	0	1	0	0	0	0	0	0	0	0	0	0	N	N	L	N	N	N	N
7	62	F	E-nucleation	2010-10-05		N	N	2	N	17.9	4.5	3	N	N	3275	107.671	0	2019-09-23	1	1	0	0	0	0	0	0	0	0	0	0	0	0	0	0	G	N	N	G	L	N	G	5.76217
8	65	M	Enucleation	2011-12-12		Y	Y	7	Y	18.2	2.3	4	N	N	2089	68.6795	2	2017-08-31	0	0	1	1	0	0	0	0	0	0	0	0	0	0	0	0	L	N	L	N	N	G	G	3.73734
9	70	F	Enucleation	2011-10-24		Y	N	3	Y	19.5	11.4	4	Y	N	1682	55.2986	1	2016-06-01	0	0	1	1	0	0	0	0	0	0	0	0	0	0	0	0	N	N	L	N	N	L	G	7.04359
10	62	M	Enucleation	2011-10-25		Y	Y	15	N	16.9	10.2	3	N	N	2890	95.0137	0	2019-09-23	0	0	1	1	0	0	0	0	0	0	0	0	0	0	0	0	N	N	L	N	N	G	G	5.47862
11	80	M	Enucleation	2011-09-20		N	N	10	N	15	10.8	3	N	N	1415	46.5205	2	2015-08-05		1	0	0	0	0	0	0	0	0	0	0	0	0	0	0	L	N	L	N	N	G	G	3.0481
12	53	F	Enucleation	2011-09-07		Y	Y	21	N	17.8	12.9	4	Y	N	1472	48.3945	1	2015-09-18		1	0	1	0	0	0	0	0	0	0	0	0	0	0	0	N	N	L	N	N	G	G	3.22369
13	84	F	Enucleation	2011-08-08		N	Y	2	N	13.1	8.7	3	N	N	2968	97.5781	0	2019-09-23	0	1	0	0	0	0	0	0	0	0	0	0	0	0	0	0	L	G	N	G	N	G	G	4.06065
14	86	M	Enucleation	2011-07-26		Y	N	5	Y	20.3	12	4	N	N	1033	33.9616	2	2014-05-24		0	1	0	0	0	0	0	0	0	0	0	0	0	0	0	L	N	L	N	N	G	G	3.28481
15	70	F	Enucleation	2011-06-27		Y	Y	5	Y	13.1	8.9	3	Y	Y	3010	98.9589	0	2019-09-23	1	1	0	0	1	0	0	0	0	0	1	0	0	0	0	0	N	N	N	G	L	G	G	3.08103
16	69	F	Enucleation	2011-06-14		Y	N	12	N	16.9	6.6	3	Y	N	3023	99.3863	0	2019-09-23	0	1	0	1	0	0	0	0	0	0	0	0	0	0	0	0	N	N	L	N	N	L	G	7.06021
17	62	F	Local Resection	2011-04-26		N	N	9	Y	17.2	10.7	3	Y	N	377	12.3945	1	2012-05-07	0	1	0	1	1	0	0	0	0	0	0	0	0	0	0	0	L	G	L	N	N	N	G	5.35287
18	63	M	Enucleation	2012-01-10		N	Y	4	Y	19.1	13.5	4	Y	Y	175	5.75342	1	2012-07-03		0	1	1	0	0	0	0	0	0	0	0	0	0	0	0	L	G	L	N	N	G	G	4.33434
19	50	F	Enucleation	2012-03-13		Y	Y	9	Y	16.5	7.1	3	N	N	1463	48.0986	1	2016-03-15		1	0	1	0	0	0	0	0	0	1	0	0	0	0	0	N	N	L	N	N	L	G	7.55123
20	59	F	Enucleation	2012-05-10		Y	Y	38	N	11.8	11.1	3	N	N	677	22.2575	1	2014-03-18		1	0	1	0	0	0	0	0	0	0	0	0	0	0	0	L	G	L	N	N	G	G	11.3878
21	59	F	Enucleation	2012-06-05		N	Y	7	N	15.7	5.2	3	Y	N	945	31.0685	2	2015-01-06	0	1	0	1	0	0	0	0	0	0	0	0	0	0	0	0	L	N	L	N	N	N	G	3.81613
22	44	M	Enucleation	2012-05-14		Y	Y	4	N	11.3	3	1	N	N	2688	88.3726	0	2019-09-23	0	0	1	1	0	0	0	0	0	0	0	0	0	0	0	0	N	N	L	N	N	N	G	3.72958
23	68	M	Enucleation	2012-06-12		Y	N	5	N	17.6	11	3	N	N	1113	36.5918	1	2015-06-30		0	0	1	0	0	0	0	0	0	0	0	0	0	0	0	N	N	L	G	L	L	G	6.37096
24	77	F	Enucleation	2013-02-12		Y	N	2	N	17.9	8.1	3	N	N	1412	46.4219	1	2016-12-25	0	0	1	1	0	0	0	0	0	0	0	0	0	0	0	0	N	N	L	N	N	G	G	3.87504
25	87	F	Enucleation	2013-03-01		Y	Y	2	Y	18.3	12.6	4	Y	N	805	26.4658	1	2015-05-15	0	0	1	1	0	0	0	0	0	0	0	0	1	0	0	0	G	N	L	N	N	G	G	5.82764
26	68	M	Enucleation	2013-03-19		Y	Y	5	N	14.5	7.7	3	Y	N	1389	45.6658	1	2017-01-06	0	1	0	1	0	0	0	0	0	0	0	0	0	0	0	0	N	N	L	N	N	N	G	3.87504
27	64	M	Enucleation	2013-03-26		Y	Y	5	N	16.1	14.6	4	Y	N	311	10.2247	1	2014-01-31	0	0	1	1	0	0	0	0	0	0	0	0	0	0	0	0	L	G	L	N	L	L	G	4.73811
28	73	M	Enucleation	2011-10-18		N	N	13	N	17.6	11.5	3	N	N	2897	95.2438	0	2019-09-23	1	1	0	0	0	1	0	0	0	1	0	0	0	0	0	0	N	N	N	G	N	N	N
29	71	F	Enucleation	2011-10-11		N	N	7	N	14.5	6.8	3	N	N	2904	95.474	0	2019-09-23		1	0	0	1	0	0	0	0	0	0	0	0	0	0	0	N	N	N	G	L	N	G	5.718
30	43	F	Local Resection	2011-10-18		Y	Y	6	N	15.1	9.7	3	N	N	701	23.0466	1	2013-09-18	0	0	1	1	0	0	0	0	0	0	0	0	0	0	0	0	N	N	L	N	N	L	G	6.14968
31	63	M	PRXT	2011-09-27		Y	N/A	N/A	N/A	12.5	4.7	2	N	N	2918	95.9342	0	2019-09-23		1	0	1	0	0	0	0	0	0	0	0	0	0	0	0	N	N	L	N	N	L	G	4.35814
32	54	F	Enucleation	2011-09-13		Y	N	9	Y	14.3	12.7	3	N	N	2999	98.5973	2	2019-11-29	0	1	0	1	1	0	0	0	0	0	0	0	0	0	0	0	L	N	L	N	N	G	G	3.28504
33	56	M	Enucleation	2011-07-12		Y	Y	8	Y	13.5	5.6	2	Y	N	2995	98.4658	0	2019-09-23	0	1	0	1	0	0	0	0	0	0	0	0	0	0	0	0	N	N	L	N	N	N	G	6.67844
34	46	M	Enucleation	2011-01-07		Y	Y	7	N	15.8	11.3	3	N	N	3181	104.581	0	2019-09-23	1	1	0	0	0	1	0	0	0	0	0	0	0	0	0	0	N	N	N	N	N	N	N
35	53	M	Enucleation	2012-02-07		N	N	3	N	12.8	11.3	3	Y	N	2785	91.5616	0	2019-09-23	1	1	0	0	0	0	0	0	0	0	0	0	0	0	0	0	L	N	N	G	N	G	G	3.46682
36	45	M	Local Resection	2012-04-24		N	N	4	N	17.8	7.7	3	N	N	150		3	2012-09-21	1	1	0	0	1	0	0	0	0	0	0	0	0	0	0	0	N	N	N	G	N	G	G	3.19987
37	79	M	Enucleation	2012-06-15		N	N	3	N	12.2	2.6	2	N	Y	849	27.9123	2	2014-10-12	1	0	1	1	0	0	0	0	0	0	0	0	0	0	0	0	N	N	L	N	N	G	G	3.62483
38	76	F	Enucleation	2012-11-20		N	Y	7	N/A	15.4	7.8	3	N	N	2498	82.126	0	2019-09-23	1	0	1	1	0	0	0	0	0	0	0	0	0	0	0	0	N	N	L	N	N	N	N
39	57	F	Enucleation	2012-12-11		N	N	4	Y	12.4	10.7	3	N	N	2477	81.4356	0	2019-09-23	0	1	0	1	0	0	0	0	0	0	0	0	0	0	0	0	L	N	L	N	N	G	G	3.14119
40	31	M	PRXT	2012-12-28		Y	N/A	N/A	N/A	13.1	4.2	2	N	N	2460	80.8767	0	2019-09-23		1	0	1	0	0	0	1	0	0	0	0	0	0	0	0	N	N	L	N	N	G	G	3.1031
41	45	F	Local Resection	2013-02-20		Y	N	4	N	15.2	8.9	3	N	N	2406	79.1014	0	2019-09-23	1	0	0	0	0	1	0	0	0	0	0	0	0	0	0	0	N	N	L	N	N	G	G	3.00197
42	57	F	Enucleation	2011-12-06		Y	N	6	N	13.3	5.1	2	N	N	2848	93.6329	0	2019-09-23	1	1	0	1	1	0	0	0	0	0	0	0	0	0	0	0	N	N	N	G	L	G	G	3.18041
43	22	M	Local Resection	2011-09-06		Y	Y	12	N	15.9	8.5	3	N	N	2360	77.589	1	2018-02-21	1	0	1	0	1	0	0	0	0	0	0	0	0	0	0	0	L	N	N	G	N	N	G	4.02897
44	54	M	Enucleation	2011-09-02		Y	Y	2	N	13.4	4.8	2	N	N	1597	52.5041	1	2016-01-16		1	0	1	0	0	0	0	0	0	0	0	0	0	0	0	N	N	L	N	N	G	G	3.46682
45	49	M	Local Resection	2011-07-15		N	N	6	N	16.3	8.9	3	N	N	2992	98.3671	0	2019-09-23	1	0	1	0	0	1	0	0	0	0	0	0	1	0	0	0				FAILED
46	64	M	Enucleation	2011-01-11		N	N	2	N	13.8	1.3	2	N	N	2181	71.7041	1	2016-12-31	0	1	0	0	0	0	0	0	0	0	0	0	0	0	0	0	L	G	L	G	L	L	G	4.21815
47	77	M	Enucleation	2012-04-17		N	N	4	N	16.2	9	3	N	N	2715	89.2603	0	2019-09-23	1	1	0	0	1	0	0	0	0	0	0	0	0	0	0	0	N	N	N	G	L	N	G	3.18085
48	61	M	Enucleation	2012-06-15		Y	Y	5	Y	16.3	8.6	3	N	N	999	32.8438	1	2015-03-11	1	1	0	0	1	0	0	0	0	0	0	0	0	0	0	0	N	N	N	G	L	N	G	3.53696
49	75	F	PRXT	2011-04-08	Enucleation; 19/04/2013	Y	N	3	N	5.8	4.9	1	N	N	817	26.8603	1	2013-07-03	0	1	0	1	0	0	0	0	0	0	0	0	0	0	0	0	N	N	ID	G	L	L	G	6.95385
50	75	M	Enucleation	2013-09-20		N	N	5	N	15.8	11.1	3	N	N	2194	72.1315	0	2019-09-23	1	1	0	0	0	1	0	0	0	0	0	0	0	0	0	0	N	N	N	G	G	N	N
51	68	F	PBR	2013-11-26	Endoresection; 15/11/2016	N	N/A	N/A	N/A	12.9	5.7	2	N	N	2127	69.9288	0	2019-09-23		0	1	0	1	0	0	0	0	0	0	0	0	0	0	0	N	N	N	G	L	N	G	3.10031
52	58	F	Enucleation	2013-12-03		N	N	4	N	16.6	9.1	3	Y	N	2120	69.6986	0	2019-09-23	1	0	0	0	0	0	0	0	0	0	0	0	0	0	0	0	N	N	N	N	N	N	N
53	68	F	Enucleation	2013-12-27		N	Y	4	N	13.5	9.1	3	N	N	2096	68.9096	0	2019-09-23	1	1	0	0	1	0	0	0	0	0	0	0	0	0	0	0	L	N	PL	G	L	G	G	4.39941
54	45	M	Enucleation	2010-08-06		Y	Y	9	N	15.1	5.5	3	N	N	1983	65.1945	1	2016-01-10		1	0	0	0	1	0	0	0	0	0	0	0	0	0	0	N	N	N	N	N	L	G	3.12815
55	80	M	Enucleation	2008-06-24		N	Y	15	N	20.6	15.7	3	N	N	420	13.8082	2	2009-08-18		0	1	0	0	0	0	0	0	0	0	0	0	0	0	0	G	N	N	G	N	N	G	5.7184
56	69	M	Enucleation	2008-07-22		N	N	2	N	20.7	11.1	4	Y	N	565	18.5753	2	2010-02-07	0	1	0	0	1	0	0	0	0	0	1	0	0	0	0	0	L	N	N	G	L	N	G	3.44478
57	62	M	Enucleation	2008-09-30		N	N	2	N	11.1	4	2	N	N	4010	131.836	0	2019-09-23		1	0	0	0	0	0	0	0	0	0	0	0	0	0	0	N	N	N	G	L	L	G	4.97919
58	69	F	Enucleation	2008-10-21		Y	N	9	Y	17	8.3	3	Y	N	1232	40.5041	1	2012-03-06	1	0	1	0	0	0	0	0	0	0	0	0	0	0	0	0	L	G	L	N	N	L	G	4.91984
59	45	F	PRXT	2013-03-19		N	N/A	N/A	N/A	13.2	4.8	2	N	N	4		3	2013-03-23		1	0	0	1	0	0	0	0	0	0	0	0	0	0	0	N	N	N	G	N	N	G	3.36501
60	65	M	PRXT	2012-09-04		N	N/A	N/A	N/A	8.2	2.8	1	N	N	2575	84.6575	0	2019-09-23		0	1	0	1	0	0	0	0	0	0	0	0	0	0	0	L	G	N	G	L	L	G	4.11991
61	64	M	PRXT	2011-04-12		Y	NA	NA	NA	10.6	2.6	1	N	N	3086	101.458	0	2019-09-23		1	0	0	0	0	0	0	0	0	0	0	0	0	0	0	N	N	N	N	N	N	N
62	64	F	Enucleation	2012-05-01		N	N	1	N	3.5	1.5	1	Y	N	2701	88.8	0	2019-09-23	1	1	0	0	0	0	0	0	0	0	0	0	0	0	0	0	N	N	N	G	N	N	N
63	16	M	Enucleation	2012-06-26		Y	N/A	N/A	N/A	15	6.3	3	N	N	2645	86.9589	0	2019-09-23		0	1	0	0	1	0	0	0	0	0	0	0	0	0	0	N	N	N	G	G	N	N
64	47	M	Local Resection	2012-09-11		N	N	3	N	12.7	10.5	3	N	N	20		3	2012-10-01	1	1	0	0	0	1	0	0	0	0	0	0	0	0	0	0	N	N	N	G	N	N	N
65	73	F	Enucleation	2012-05-25		N	N	6	N	16.2	7.2	3	N	N	2677	88.011	0	2019-09-23	1	0	1	0	0	0	0	0	0	0	0	0	0	0	0	0	N	N	N	G	N	N	N
66	77	F	PRXT	2012-01-31		N	N/A	N/A	N/A	12.4	4.5	2	N	Y	963	31.6603	2	2014-09-20		0	1	0	0	1	0	0	0	0	0	0	0	0	0	0	N	N	N	N	N	N	N
67	58	M	Enucleation	2012-05-15		Y	Y	5	Y	17.9	10.7	3	Y	N	2687	88.3397	0	2019-09-23	1	0	0	0	0	1	1	0	0	0	0	0	0	0	0	0	N	N	N	G	L	N	N
68	67	M	PBR	2012-07-10		Y	N/A	N/A	N/A	13.2	2.8	2	N	N	2631	86.4986	0	2019-09-23		1	0	0	0	1	0	0	0	0	0	0	0	0	0	0	N	N	N	G	N	N	N
69	73	M	PRXT	2012-07-31		Y	N/A	N/A	N/A	12.4	3	2	N	N	2610	85.8082	0	2019-09-23		0	1	0	0	1	0	0	0	0	0	0	0	0	0	0	N	N	N	N	N	N	N
70	59	F	Endoresection	2013-01-22		Y	N/A	N/A	N/A	5.6	1.4	1	N	N	2435	80.0548	0	2019-09-23		1	0	0	1	0	0	0	0	0	0	0	0	0	0	0	N	N	N	G	N	N	G	3.26145
71	47	M	Enucleation	2013-04-19		N	Y	10	N	14.2	6.9	3	N	N	2348	77.1945	0	2019-09-23	1	0	1	0	0	1	0	0	0	0	0	0	0	0	0	0	N	N	N	G	N	N	N
72	65	F	PRXT	2013-04-09		N	N/A	N/A	N/A	9.4	3	1	Y	N	2358	77.5233	0	2019-09-23		1	0	0	0	0	0	0	0	0	0	0	0	0	0	0	N	N	N	N	N	N	N
73	64	M	Enucleation	2013-06-14		N	N	6	N	17.2	7.9	3	N	N	2292	75.3534	0	2019-09-23	1	1	0	0	0	0	0	0	0	0	0	0	0	0	0	0	N	N	N	G	N	N	N
74	63	F	Enucleation	2008-10-28		Y	N	6	N	11	4.6	2	N	N	3982	130.915	0	2019-09-23	1	0	1	0	1	0	0	0	0	0	0	0	0	0	0	0	N	N	N	N	N	N	N
75	86	M	Enucleation	2009-04-28		N	N	12	N	12.4	6.9	3	N	N	2028	66.674	2	2014-11-16		0	1	0	0	0	0	0	0	0	0	0	0	0	0	0	L	N	N	G	N	N	N
76	66	F	Enucleation	2009-05-19		Y	N	2	N	17.9	10.9	3	N	N	3779	124.241	0	2019-09-23	1	1	0	0	0	1	0	0	0	0	0	1	0	0	0	0	N	N	N	N	N	N	N
77	76	M	Enucleation	2009-06-02		N	N	2	N	10.3	1.1	1	N	N	3765	123.781	0	2019-09-23		1	0	0	0	1	0	0	0	0	0	0	0	0	0	0	N	N	N	G	G	N	N
78	81	F	Enucleation	2009-08-21		Y	Y	8	N	16.6	10.2	3	Y	N	1221	40.1425	1	2012-12-24	0	0	1	1	0	0	0	0	0	0	0	0	0	0	0	0	N	N	L	N	N	N	N
79	52	M	Enucleation	2014-05-06		Y	Y	12	N	15.4	12.1	4	N	N	1029	33.8301	1	2017-02-28	0	1	0	1	0	0	0	0	0	0	0	0	0	0	0	0	N	N	L	N	N	G	G	3.53133
80	59	F	Enucleation	2014-04-08		Y	Y	6	Y	21	14	4	N	N	889	29.2274	1	2016-09-13	0	0	1	0	0	0	0	0	0	0	0	1	0	0	0	0	N	N	L	N	N	G	G	3.73346
81	77	M	Enucleation	2013-08-29		Y	Y	2	N	17.3	11.9	3	Y	N	650	21.3699	1	2015-06-10	0	0	0	0	0	0	1	0	0	0	0	0	0	0	0	0	N	N	L	N	N	G	G	3.21632
82	66	M	Enucleation	2013-02-05		Y	Y	4	N	13.7	8	3	N	N	2421	79.5945	0	2019-09-23	1	1	0	0	1	0	0	0	0	0	0	0	0	0	0	0	N	N	N	G	N	G	G	3.49432
83	64	M	Enucleation	2013-05-28		Y	Y	5	N	18	10.9	3	Y	N	822	27.0247	1	2015-08-28	0	0	1	1	0	0	0	0	0	0	0	0	0	0	0	0	N	N	L	N	N	N	G	4.49778
84	39	M	Local Resection	2011-01-04	Enucleation; 02/08/2013	Y	Y	72	Y	15.5	7.8	3	Y	Y	1020	33.5342	1	2013-10-20	1	1	0	0	1	1	0	0	0	0	0	0	0	0	0	0	N	N	N	N	N	N	N
85	64	F	Enucleation	2013-09-03		N	Y	8	N	10.6	10.4	3	N	N	1077	35.4082	1	2016-08-15	0	0	1	1	0	0	0	0	0	0	0	0	0	0	0	0	N	N	L	N	N	G	G	3.53991
86	51	M	Enucleation	2014-12-19		N	Y	2	N	8.9	7.2	2	N	N	1739	57.1726	0	2019-09-23	1	1	0	0	0	1	0	0	0	0	0	0	0	0	0	0	N	N	N	N	N	N	N
87	67	M	Enucleation	2013-07-16		Y	N	5	N	17.4	6.5	3	N	N	858	28.2082	1	2015-11-21	0	1	0	1	0	0	0	0	0	0	0	0	0	0	0	0	N	N	L	G	L	L	G	5.26164
88	68	M	Enucleation	2014-01-07		Y	Y	12	N	19.2	12.1	4	Y	N	1555	51.1233	1	2018-04-11	0	0	0	1	0	0	0	0	0	0	0	0	0	0	0	0	N	N	L	N	N	L	G	6.99009
89	55	F	Enucleation	2015-05-12		Y	N	6	N	18.8	11.2	4	Y	N	1595	52.4384	0	2019-09-23	0	1	0	1	0	0	0	0	0	0	0	0	0	0	0	0	N	N	L	N	L	L	G	8.4486
90	49	M	Local Resection	2009-01-06		Y	N	3	N	18	8.8	3	N	N	657		3	2010-10-25		1	0	0	0	0	0	0	0	0	0	0	0	0	0	0	N	N	N	N	N	N	G	3.08295
91	75	M	Enucleation	2013-11-22		N	Y	2	N	20.1	8.3	4	N	N	2131	70.0603	0	2019-09-23	0	0	1	1	0	0	0	0	0	0	0	0	0	0	0	0	N	G	L	N	N	N	N
92	78	M	PBR	2011-03-01	Enucleation; 23/08/2013	Y	N	2	N	9.7	1.8	1	N	N	3128	102.838	0	2019-09-23	0	0	1	0	0	0	0	0	0	0	0	0	0	0	0	0	N	N	N	N	N	N	N
93	83	F	Enucleation	2009-11-27		N	N	11	N	14.1	13.1	3	N	N	1773	58.2904	1	2014-10-05	1	0	0	0	1	1	0	0	0	0	0	0	0	0	0	0	L	N	N	N	N	N	N
94	66	M	PBR	2014-06-24		Y	N/A	N/A	N/A	15.3	5.8	3	N	N	1917	63.0247	0	2019-09-23		1	0	1	0	0	0	0	0	0	0	0	0	0	0	0	N	N	L	G	L	L	G	4.90146
95	63	M	Enucleation	2014-09-02		Y	N/A	N/A	N/A	13.8	5.7	2	N	N	558	18.3452	1	2016-03-13		1	0	1	0	0	0	0	0	0	0	0	0	0	0	0	L	N	L	N	N	G	G	4.4417
96	76	F	PBR	2014-01-07		Y	N/A	N/A	N/A	18.8	2.6	4	Y	N	588	19.3315	1	2015-08-18		0	1	1	0	0	0	0	0	0	0	0	0	0	0	0	L	N	L	G	L	G	G	3.95619
97	69	F	PRXT	2014-03-14		Y	N/A	N/A	N/A	8.4	0.9	1	N	N	2019	66.3781	0	2019-09-23		1	0	0	1	0	0	0	0	0	0	0	0	0	0	0	L	N	L	N	N	N	N
98	45	F	PRXT	2014-10-28		N	N/A	N/A	N/A	7.7	2.1	1	N	N	1791	58.8822	0	2019-09-23		1	0	1	0	0	0	0	0	1	0	0	0	0	0	0	N	N	L	N	N	N	N
99	67	F	PBR	2014-07-01		N	N/A	N/A	N/A	10.4	6.2	2	Y	N	1910	62.7945	0	2019-09-23		0	1	1	0	0	0	0	0	0	0	0	0	0	0	0	G	N	L	N	N	N	G	4.41316
100	56	F	PBR	2014-07-22		Y	N/A	N/A	N/A	12.2	3.9	2	N	N	1889	62.1041	0	2019-09-23		1	0	0	1	0	0	0	0	0	0	0	0	0	0	0	N	N	N	G	L	N	N
101	57	F	PBR	2014-03-25		Y	N/A	N/A	N/A	13.8	2.5	2	N	N	2008	66.0164	0	2019-09-23		1	0	0	0	0	0	0	0	0	0	0	0	0	0	0	N	N	N	G	N	G	G	4.31755
102	65	F	PRXT	2014-12-09		N	N/A	N/A	N/A	9.6	3.5	2	N	N	1749	57.5014	0	2019-09-23		0	1	0	1	0	0	0	0	0	0	0	0	0	0	0	N	N	N	N	N	G	G	4.42143
103	72	F	PRXT	2014-05-13		Y	N/A	N/A	N/A	13.6	2.4	2	Y	N	1959	64.4055	0	2019-09-23		1	0	0	0	0	0	0	0	0	0	0	0	0	0	0	N	N	N	G	G	G	G	5.02565
104	66	F	PBR	2014-11-28		N	N/A	N/A	N/A	6.6	3.5	1	N	Y	1760	57.863	0	2019-09-23		0	0	0	0	0	0	0	0	0	0	0	0	0	0	0	N	N	N	N	N	N	N
105	47	F	PRXT	2014-06-10		N	N/A	N/A	N/A	12.2	3	2	N	N	1931	63.4849	0	2019-09-23		1	0	0	0	1	0	0	0	0	0	0	0	0	0	0	N	N	N	G	G	N	N
106	50	M	PRXT	2014-04-15		N	N/A	N/A	N/A	14.8	4.9	2	N	N	1987	65.326	0	2019-09-23		0	0	0	1	0	0	0	0	0	0	0	0	0	0	0	N	N	N	N	N	N	N
107	65	F	PBR	2014-07-11		N	N/A	N/A	N/A	5.5	3.5	1	Y	N	1900	62.4658	0	2019-09-23		1	0	0	0	0	0	0	0	0	0	0	0	0	0	0	N	N	L3q	N	N	N	N
108	69	M	PRXT	2014-05-09		N	N/A	N/A	N/A	10.8	5.4	2	N	N	1963	64.537	0	2019-09-23		0	1	1	0	0	0	0	0	0	0	0	0	0	0	0	L	N	L	N	N	G	G	3.9647
109	54	M	Enucleation	2011-08-23		Y	N	18	N	16.9	11	3	N	Y	2953	97.0849	0	2019-09-23		0	0	0	0	0	0	0	0	0	1	0	0	0	0	0	N	N	N	G	L	G	G	4.42143
110	56	F	Enucleation	2011-10-11		Y	Y	12	N	18.4	10	4	N	N	1377	45.2712	1	2015-07-19	0	0	1	1	0	0	0	0	0	0	0	0	0	0	0	0	N	N	L	N	N	G	G	5.02565
111	69	M	Enucleation	2012-07-03		Y	Y	2	N	16.9	12	3	Y	N	2638	86.7288	0	2019-09-23	0	0	1	0	1	0	0	0	0	0	0	0	0	0	0	0	L	N	L	N	N	N	N
112	54	M	Enucleation	2013-02-12		N	Y	7	N	19.5	10.9	4	N	N	869	28.5699	1	2015-07-01	0	1	0	1	0	0	0	0	0	0	0	0	0	0	0	0	N	N	L	G	L	N	G	3.08573
113	67	M	Enucleation	2012-05-04		Y	Y	16	N	19.2	7	4	Y	N	288	9.46849	1	2013-02-16	0	0	1	1	0	0	0	0	0	0	0	0	0	0	0	0	N	N	L	G	L	L	G	4.0615
114	33	F	Enucleation	2009-04-20		N	Y	9	N	14.2	6.6	3	N	N	3808	125.195	0	2019-09-23	1	0	1	0	1	0	0	0	0	0	0	0	0	0	0	0	N	N	N	G	N	N	N
115	44	M	Local Resection	2008-11-18		N	N	4	Y	10.5	11.2	3	N	N	3961	130.225	0	2019-09-23	1	1	0	0	0	1	0	0	0	0	0	0	0	0	0	0	N	N	N	G	N	N	N
116	53	F	Enucleation	2009-05-18		Y	Y	4	Y	22	13.9	4	N	N	2043	67.1671	1	2014-12-21		1	0	1	0	0	0	0	0	0	0	1	0	0	0	0	N	N	L	N	N	N	N
117	73	M	Enucleation	2008-10-06		Y	Y	4	N	13.5	4.6	2	Y	Y	826	27.1562	1	2011-01-10		0	1	1	0	0	0	0	0	0	0	0	0	0	0	0	N	N	L	N	N	L	G	3.67747

## Sheet: Key
Epithelioid cells	Y= Yes	N= No
Loops	Y= Yes	N= No
Necrosis	Y= Yes	N= No
CBI	Y= Yes	N= No
EO Spread	Y= Yes	N= No
Status	0 = Alive	1 = Death from metastastic melanoma	2 = Death from other causes	3 = Lost to follow-up
nBAP1 IHC	0 = nBAP1 -ve	1 = nBAP1 +ve
GNAQ	0 = Wild-type	1 = Mutation
GNA11	0 = Wild-type	1 = Mutation
BAP1	0 = Wild-type	1 = Mutation
SF3B1	0 = Wild-type	1 = Mutation
EIF1AX	0 = Wild-type	1 = Mutation
CYSLTR2	0 = Wild-type	1 = Mutation
PLCB4	0 = Wild-type	1 = Mutation
SRSF2	0 = Wild-type	1 = Mutation
KTN1	0 = Wild-type	1 = Mutation
TTC28	0 = Wild-type	1 = Mutation
CSMD1	0 = Wild-type	1 = Mutation
TP53BP1	0 = Wild-type	1 = Mutation
BRAF	0 = Wild-type	1 = Mutation
DLK2	0 = Wild-type	1 = Mutation
FBXW7	0 = Wild-type	1 = Mutation
Chr1p	L = Loss	N = Normal	G = Gain
Chr1q	L = Loss	N = Normal	G = Gain
Chr3	L = Loss	N = Normal	G = Gain	ID = Isodisomy	PL = Partial Loss
Ch6p	L = Loss	N = Normal	G = Gain
Chr6q	L = Loss	N = Normal	G = Gain
Chr8p	L = Loss	N = Normal	G = Gain
Chr8q	L = Loss	N = Normal	G = Gain
