# Supplementary material for: Targeted Next-Generation Sequencing of 117 Routine Clinical Samples Provides Further Insights into the Molecular Landscape of Uveal Melanoma
Source: Cancers (Basel). 2020 Apr 23;12(4):1039. doi: 10.3390/cancers12041039 (PMC7226611; doi:10.3390/cancers12041039)
Supplement: Supplementary file 1 [file cancers-12-01039-s001.zip › cancers-744518- supplementary Tables/cancers-744518-Table S4.xlsx]

## Sheet: Sheet1
Sample No.	nBAP1	Age at PM	Gender	Primary Treatment	Date of PM	Secondary Treatment	Epithelioid	Loops	Mitotic	Necrosis	LBD	UH	CBI	EOE	SurvDays	SurvMon	Status	LastFU	TEST	1p	Chr3	6p	6q	8p	8q	SF3B1	Comments
1	1	45	F	Local Resection	2013-02-20		1	0	4	0	15.2	8.9	0	0	2406	79.1014	0	2019-09-23	0	1	0	3	1	1	1	wt
2	1	53	M	Local Resection	2013-05-21		0	1	1	0	11.2	10	0	0	2316	76.1425	0	2019-09-23	0	0	0	3	0	3	0	R625C
3	1	57	M	Enucleation	2013-08-09		1	1	4	0	10.2	1.7	0	0	2236	73.5123	0	2019-09-23	0	0	0	3	2	3	3	R625H
4	1	62	M	Enucleation	2014-01-28		1	1	2	0	18.3	11.4	0	0	2064	67.8575	0	2019-09-23	0	1	0	1	1	1	1	wt
5	1	66	F	Enucleation	2014-03-04		1	0	5	1	12	6.9	0	1	2029	66.7068	0	2019-09-23	0	1	0	1	1	1	2	wt
6	1	63	M	Enucleation	2014-04-08		0	0	9	0	10	4.2	0	0	1994	65.5562	0	2019-09-23	0	1	0	1	1	1	2	wt
7	1	62	F	Enucleation	2014-05-06		1	0	2	1	12	8.5	0	0	1966	64.6356	0	2019-09-23	0	1	0	2	1	1	2	R625H
8	1	53	F	Enucleation	2014-07-22		0	0	2	0	22.7	9.9	0	0	1889	62.1041	0	2019-09-23	0	1	0	2	1	1	1	wt
9	1	66	F	Enucleation	2014-07-29		1	0	6	0	12.4	8	0	0	1882	61.874	0	2019-09-23	0	0	0	2	0	1	1	wt
10	1	59	M	Local Resection	2014-08-05		0	1	7	1	15	11.6	0	0	1875	61.6438	0	2019-09-23	0	1	0	2	0	1	2	R625C	Alive with mets 14/12/2017, Liver Resection patient alive and well at last appointment
11	1	68	F	Enucleation	2014-08-19		0	0	5	0	11.2	3.6	0	0	1861	61.1836	0	2019-09-23	0	0	0	1	1	1	1	wt
12	1	70	M	Enucleation	2015-01-13		1	1	5	0	19.1	2.8	0	0	678	22.2904	1	2016-11-21	0	0	0	2	1	1	2	wt	Death from metastatic melanoma
13	1	80	M	Enucleation	2015-01-13		1	0	5	1	11.7	8.8	0	0	1714	56.3507	0	2019-09-23	0	1	0	1	2	1	2	wt
14	1	54	M	Enucleation	2015-01-20		1	0	6	0	9.8	7.8	1	0	1707	56.1205	0	2019-09-23	0	1	0	1	1	1	1	wt	Alive with metastatic disease 06/06/2016
15	1	50	M	Enucleation	2018-02-27		1	1	8	0	21.7	11.5	1	0	573	18.8384	0	2019-09-23	0	L	L	G	N	N	G	R625C
16	1	71	M	Enucleation	2018-03-16		0	1	3	0	16.2	12.5	1	0	556	18.2795	0	2019-09-23	0	L	L	N	N	G	G	wt
17	1	72	F	Enucleation	2018-07-17		0	1	3	1	15.8	7.5	0	0	433	14.2356	0	2019-09-23	1		L					wt
18	1	61	M	Enucleation	2018-10-26		1	1	10	0	17.6	6.9	0	1	332	10.9151	0	2019-09-23	0	N	L	N	N	L	G	wt
19	1	75	F	Enucleation	2019-03-26		0	1	7	0	18.8	9	0	0	181	5.95068	0	2019-09-23	0	L	L	G	N	L	G	wt
20	1	53	M	Enucleation	2017-08-08		1	1	3	1	14.3	8.2	0	1	776	25.5123	0	2019-09-23	0	N	L	N	N	N	N	wt
